# Supplementary material for: Loss of TDP-43 in male germ cells causes meiotic failure and impairs fertility in mice
Source: PubMed Central journal article supplement (PMC8569592; doi:10.1016/j.jbc.2021.101231), 2021-09-29
Supplement: mmc2.pdf [file mmc2.pdf]

**Table S1.** Primers used for quantitative RT-qPCR for meiotic gene targets.

| Gene           | Accession number | Primers                         | Position (nucleotide) | Size (nucleotide) |
|----------------|------------------|---------------------------------|-----------------------|-------------------|
| <i>Dmc1</i>    | NM_010059.3      | 5'-GGTGGCATTGAAAGTATGGCAA-3'    | 521-619               | 99                |
|                |                  | 5'-TGGAAGTTGAGCTGTCACACA-3'     |                       |                   |
| <i>Hormad1</i> | NM_001289534.1   | 5'-TTCCCTCAGGCGGTGC-3'          | 36-118                | 83                |
|                |                  | 5'-CAATGCACTCAGGGAAGCTG-3'      |                       |                   |
| <i>Hormad2</i> | NM_029458.1      | 5'-ACACAAATCCAAGGAACCTGA-3'     | 563-665               | 103               |
|                |                  | 5'-CTTGTGCTGCTGCTGTCAAA-3'      |                       |                   |
| <i>SCC3</i>    | NM_009282.4      | 5'-CCAGTGTTCCAGGATGTCGAG-3'     | 797-906               | 110               |
|                |                  | 5'-AGTCACCACTGTCCTCATCAAAT-3'   |                       |                   |
| <i>Spo11</i>   | NM_012046.2      | 5'-TAGTGCCACGGCTACTGCT-3'       | 640-748               | 109               |
|                |                  | 5'-GAGCCGCTGAAATGTTGCAT-3'      |                       |                   |
| <i>Mei1</i>    | NM_028897.3      | 5'-CAGGACCAGAGAGTCTGCATC-3'     | 270-379               | 110               |
|                |                  | 5'-GTGAGCTGGACAAGGACTTCA-3'     |                       |                   |
| <i>Msh4</i>    | NM_031870.3      | 5'-CCAGGCCGAGTACGGAAGG-3'       | 390-485               | 96                |
|                |                  | 5'-TGTTTTCAAATGATGAACCTGGC-3'   |                       |                   |
| <i>Prdm9</i>   | NM_144809.3      | 5'-AGAGTGGACACCTAAGCAACA-3'     | 321-410               | 90                |
|                |                  | 5'-GGCATTCTAGATGATTCCTTCTGC-3'  |                       |                   |
| <i>Rad21L</i>  | NM_001276400.1   | 5'-TGAATTGGAGTCATCAGGCAG-3'     | 1386-1495             | 110               |
|                |                  | 5'-ACTGCATTCCCATTTTGTGAA-3'     |                       |                   |
| <i>Rec8</i>    | NM_020002.3      | 5'-TTTCAACAGTGCCAGTACCTT-3'     | 489-598               | 110               |
|                |                  | 5'-AAGCTAGGTAGGTCAGCCTC-3'      |                       |                   |
| <i>Sycp1</i>   | NM_011516.2      | 5'-GCGGGAGGAGACTCCAATA-3'       | 211-317               | 107               |
|                |                  | 5'-GCAGGATCTTTATCAATGTTTTCCC-3' |                       |                   |
| <i>Sycp2</i>   | NM_177191.3      | 5'-GCCACAGCCTAAAGTGTCT-3'       | 89-179                | 91                |
|                |                  | 5'-TCTAACTGTTGGAGGTCTGGTC-3'    |                       |                   |
| <i>Sycp3</i>   | NM_011517.2      | 5'-TTGCTGATGAAAAGGCTCCAGT-3'    | 261-357               | 97                |
|                |                  | 5'-TCCAGCATATTCTGTACTTCACCT-3'  |                       |                   |
| <i>Tardbp</i>  | NM_145556.4      | 5'-GTCCGACTGGTGAAGGAAT-3'       | 490-586               | 97                |
|                |                  | 5'-CCATTTTCCTTTGTTATCTTTGGG-3'  |                       |                   |

**Table S2.** Primers used for quantitative RT-qPCR for retinoic acid pathway targets. \*Targets were obtained from Gely-Pernot *et al.* 2015 (Reference # 19)

| <b>Gene</b>      | <b>Accession number</b> | <b>Primers</b>                                             | <b>Position (nucleotide)</b> | <b>Size (nucleotide)</b> |
|------------------|-------------------------|------------------------------------------------------------|------------------------------|--------------------------|
| <i>RARgamma*</i> | NM_011244.4             | 5'-CTCGGGTCTATAAGCCATGC-3'<br>5'-CCCCATAGTGGTAGCCAGAA-3'   | 746-805                      | 60                       |
| <i>RXRalpha*</i> | NM_001290481.1          | 5'-GATATCAAGCCGCCACTAGG-3'<br>5'-TTGCAGCCCTCACAAGTGT-3'    | 384-534                      | 151                      |
| <i>RXRbeta*</i>  | NM_001205               | 5'-GGGCTGCAAGGGTTTCTTCA-3'<br>5'-CTCCTGAACCGCCTCCCTTT-3'   | 186-348                      | 163                      |
| <i>RBP4</i>      | NM_001159487.1          | 5'-GAGAGTTTGGCTCCACCGAG-3'<br>5'-CCGGAGTCTGCCTCCTGAAC-3'   | 271-379                      | 109                      |
| <i>Rdh11</i>     | NM_021557.6             | 5'-GTGGTGCTGAGATGTTTCGGA-3'<br>5'-CCACTGGACAGCATTTCCTGA-3' | 55-148                       | 94                       |
| <i>Crpb1</i>     | NM_013496.3             | 5'-GGACGCAAATGCAGGAGTTT-3'<br>5'-AGCTCTCGGGTCCAGTAAGT-3'   | 389-495                      | 107                      |
| <i>Crpb2</i>     | NM_007759.2             | 5'-GATGGAGAGCTGATCCTGACAA-3'<br>5'-GGAAGTCGTCTCAGGCAGTT-3' | 497-602                      | 106                      |
| <i>Rarres1</i>   | NM_001164763.1          | 5'-AGCATCAGCATACCTGACAGT-3'<br>5'-ATACGTATGAGCTGCCGAG-3'   | 595-683                      | 89                       |
| <i>Cyp26a1</i>   | NM_007811.2             | 5'-CAGATGGTGCTTCAGCGGAG-3'<br>5'-ACATTATCCGCGCCCATCAC-3'   | 277-392                      | 116                      |
| <i>RARbeta*</i>  | NM_011243               | 5'-GCTGGGTGCTGTTTTCTAA-3'<br>5'-GAAACAGGCCTTCTCAGTGC-3'    | 1167-1282                    | 135                      |
| <i>RXRgamma*</i> | NM_009107               | 5'-TGTGGTCAACAGTGTCAGCA-3'<br>5'-AGAAGCCTTTC AACCTTCA-3'   | 6-190                        | 185                      |
| <i>Sall4a*</i>   | NM_175303.4             | 5'-AGTGTCACCTGCCAATAGCC-3'<br>5'-TGCCAGGCACTTCAACTTT-3'    | 2560-2726                    | 167                      |
| <i>Sall4b*</i>   | NM_201395.3             | 5'-CTCGACCAGTCCAAGAAAGG-3'<br>5'-TGCCAGGCACTTCAACTTT-3'    | 1232-1394                    | 163                      |
| <i>Stra6</i>     | NM_001162476.1          | 5'-TCTAGGAGCTGAGGAGGTGC-3'<br>5'-GCAGAACCAGGAACGACAGT-3'   | 474-583                      | 110                      |
